# Supplementary material for: An oxygen doped porous hard carbon derived from durian shell for high-performance sodium ion storage
Source: Royal Society of Chemistry journal article supplement (doi:10.1039/d5ra09761d), 2026-01-01
Supplement: d5ra09761d1.pdf [file d5ra09761d1.pdf]

## Supporting information

### **An oxygen doped Porous hard carbon derived from durian shell for high-performance sodium ion storage**

*Jianliang Guo,<sup>†,‡</sup> Zhihua Sun,<sup>‡</sup> Wenzheng Zhu,<sup>‡</sup> Lei Li,<sup>‡</sup> Song Han,<sup>†,\*</sup> Hongxun Yang,<sup>‡,\*</sup>*

*<sup>†</sup>National Energy Group Science and Technology Research Institute Co., Ltd., Nanjing 210008, Jiangsu, China; <sup>‡</sup>School of Environmental & Chemical Engineering, Jiangsu University of Science and Technology, Zhenjiang 212003, Jiangsu, China*

\*Corresponding author:

E-mail: yhongxun@126.com;

F-mail: 12068942@ceic.com

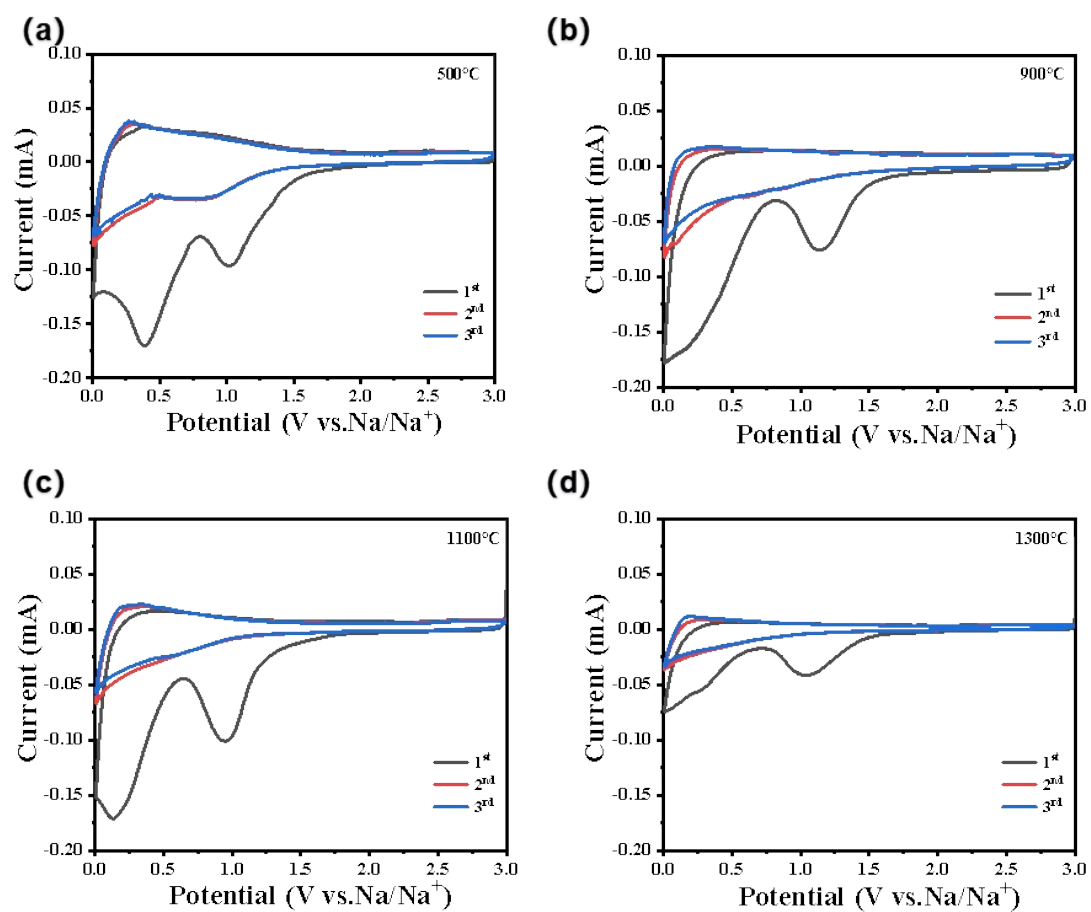

Fig. S1 (a-d) The CV curves of the first four electrodes of DSHC500, DSHC900, DSHC1100 and DSHC1300 at a scanning rate of  $0.1 \text{ mV s}^{-1}$ .

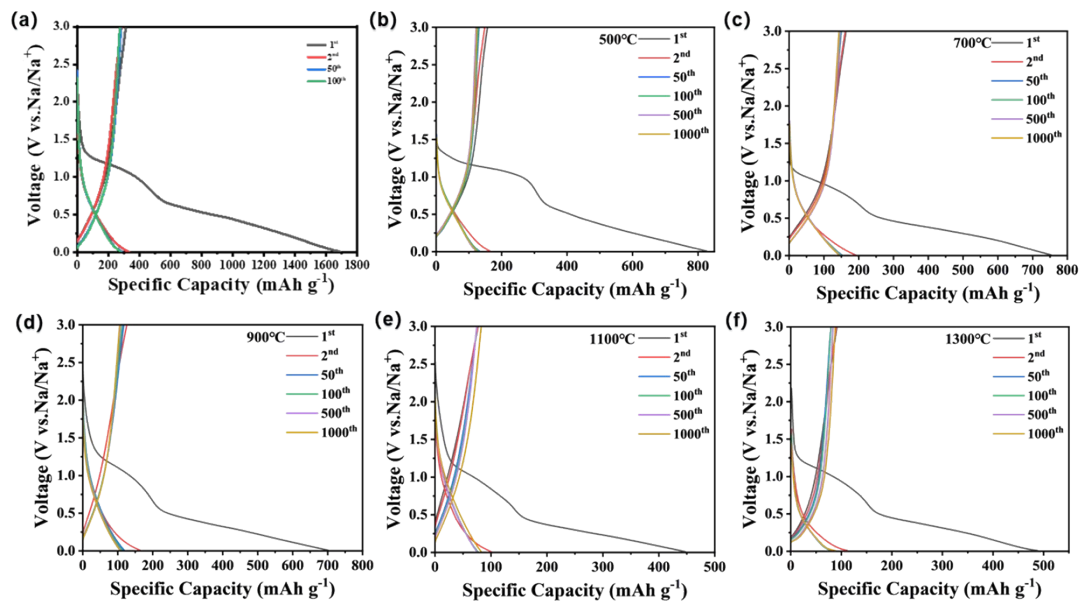

Fig. S2 (a) The 1st, 2nd, 50th and 100th charge-discharge curves of DSHC700 at 25 mA g<sup>-1</sup>; (b-f) The 1st, 2nd, 50th, 100th, 500th and 1000th charge-discharge curves of DSHC500, DSHC700, DSHC900, DSHC1100 and DSHC1300 of different temperature at 500 mA g<sup>-1</sup>.

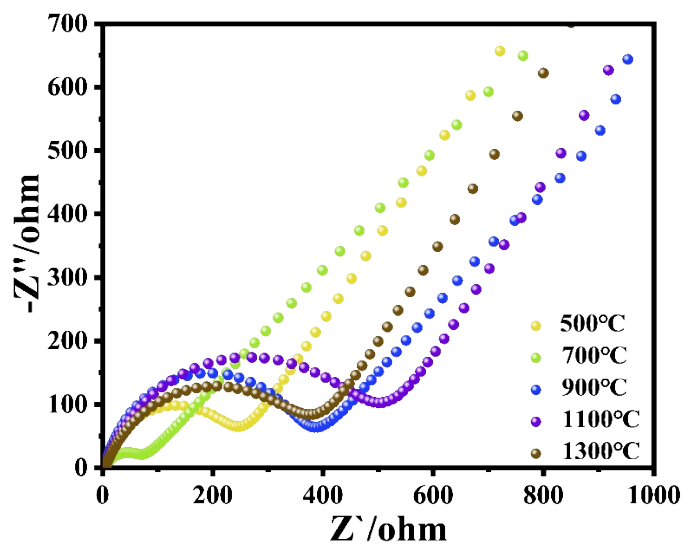

Fig. S3. The EIS spectra of DSHC-x after cycling.

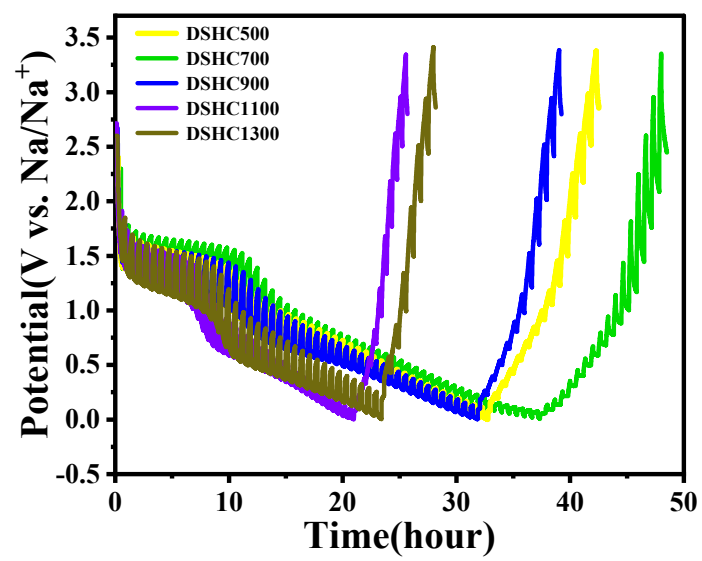

Fig. S4. GITT curves of DSHC-x.

Table S1.  $d_{002}$ ,  $I_D/I_G$ ,  $L_a$  of DSHC-x series.

|                      | DSHC500 | DSHC700 | DSHC900 | DSHC1100 | DSHC1300 |
|----------------------|---------|---------|---------|----------|----------|
| $d_{002}(\text{nm})$ | 0.378   | 0.382   | 0.391   | 0.367    | 0.362    |
| $I_D/I_G$            | 1.03    | 1.013   | 1.003   | 1.11     | 1.08     |
| $L_a(\text{nm})$     | 19.697  | 18.978  | 19.167  | 17.319   | 17.801   |

Table S2. Comparison of the electrochemical performance of DSHC700 in this work and the previously reported hard carbon materials based anode materials

| Samples   | Initial<br>coulumbic<br>efficiency<br>(ICE) | Reversible<br>capacity<br>(mAhg <sup>-1</sup> ) | Current<br>Density<br>(mA g <sup>-1</sup> ) | Cycle<br>number | Ref.                 |
|-----------|---------------------------------------------|-------------------------------------------------|---------------------------------------------|-----------------|----------------------|
| DSHC700   | 18.5%                                       | 280.2                                           | 25                                          | 100             | <b>This<br/>work</b> |
| CDHC-1300 | 80%                                         | 250.3                                           | 25                                          | 100             | 43                   |
| LPC-800   | \                                           | 277.5                                           | 25                                          | 100             | 44                   |
| PSDHC-600 | \                                           | 256.5                                           | 25                                          | 100             | 45                   |
| RPHC-1200 | 64%                                         | 224.3                                           | 25                                          | 100             | 46                   |
| CPP       | 59.8%                                       | 221.5                                           | 100                                         | 200             | 47                   |
| KHC-1300  | 64%                                         | 205                                             | 200                                         | 300             | 48                   |
| SC-800    | 78.2%                                       | 230                                             | 50                                          | 50              | 49                   |
| RRP-800-N | 99.91%                                      | 223.7                                           | 31                                          | 100             | 50                   |
| HC-SC     | 92.3%                                       | 261                                             | 50                                          | 100             | 51                   |
| SAL       | 58.9%                                       | 245.3                                           | 50                                          | 100             | 52                   |
| SCL       | 88.1%                                       | 207.2                                           | 50                                          | 100             | 52                   |
| ECL       | 69.7%                                       | 227.1                                           | 50                                          | 100             | 52                   |
| CSHP2     | 44.1%                                       | 215                                             | 100                                         | 100             | 53                   |

## Reference:

- [1] Y. Tang, J. He, J. Peng, J. Yang, Z. Wu, P. Liu, K. Zhou, S. Hu, L. Hu, X. Wang, Electrochemical Behavior of the Biomass Hard Carbon Derived from Waste Corncob as a Sodium-Ion Battery Anode, *Energy Fuels*, 38(2024) 7389-7398.
- [2] M. Yan, Y. Qin, L. Wang, M. Song, D. Han, Q. Jin, S. Zhao, M. Zhao, Z. Li, X. Wang, L. Meng, X. Wang, Recent Advances in Biomass-Derived Carbon Materials for Sodium-Ion Energy Storage Devices, *Nanomaterials*, 12(2022) 936.
- [3] W. Lv, F. Wen, J. Xiang, J. Zhao, L. Li, L. Wang, Z. Liu, Y. Tian, Peanut shell derived hard carbon as ultralong cycling anodes for lithium and sodium batteries, *Electrochim. Acta*, 176(2015) 533-541.
- [4] Z. Zhang, A. Zhang, S. Wang, J. Sun, L. Hou, C. Yuan, Biomass-derived hard carbon with tunable microstructures for sustainable and high-rate sodium-ion batteries, *New. J. Chem.* 49 (2025) 6277-6287.
- [5] Z. Zhang, X. Li, P. Dong, G. Wu, J. Xiao, X. Zeng, Y. Zhang, X. Sun, Honeycomb-like hard carbon derived from pine pollen as high-performance anode material for sodium-ion batteries, *ACS Appl. Mater. Interfaces*, 10 (2018) 42796-42803.
- [6] P. Wang, X. Zhu, Q. Wang, X. Xu, X. Zhou, J. Bao, Kelp-derived hard carbons as advanced anode materials for sodium-ion batteries, *J. Mater. Chem. A*, 5 (2017) 5761-5769.
- [7] M. Kim, J. F. S. Fernando, Z. Li, A. Alowasheir, A. Ashok, R. Xin, D. Martin, A. K. Nanjundan, D. V. Golberg, Y. Yamauchi, N. Amiralian, J. Li, Ultra-stable sodium ion storage of biomass porous carbon derived from sugarcane, *Chem. Eng. J.*, 445 (2022) 136344.
- [8] F. Lou, J. Wang, X. Wang, M. Zhang, J. Yuan, Unraveling multi-level porous carbon negative electrode materials based on *Rosa roxburghii* pomace for high-performance sodium-ion batteries, *RSC Adv.*, 15 (2025) 20872-20880.
- [9] C. Wei, W. Dang, M. Li, X. Ma, M. Li, Y. Zhang, Hard-soft carbon nanocomposite prepared by pyrolyzing biomass and coal waste as sodium-ion batteries anode material, *Mater. Lett.*, 330 (2023) 133368.
- [10] H. Wei, H. Cheng, N. Yao, G. Li, Z. Du, R. Luo, Z. Zheng, Invasive alien plant

biomass-derived hard carbon anode for sodium-ion batteries, *Chemosphere*, 343 (2023) 140220.

[11] S. Chen, K. Tang, F. Song, Z. Liu, N. Zhang, S. Lan, X. Xie, Z. Wu, Porous hard carbon spheres derived from biomass for high-performance sodium/potassium-ion batteries, *Nanotechnology*, 33 (2022) 055401.

Table S3. Impedance fitting values of DSHC-x electrodes before and after cycling.

|          | Before cycling     |                       | After cycling      |                       |
|----------|--------------------|-----------------------|--------------------|-----------------------|
|          | $R_s$ ( $\Omega$ ) | $R_{ct}$ ( $\Omega$ ) | $R_s$ ( $\Omega$ ) | $R_{ct}$ ( $\Omega$ ) |
| DSHC500  | 2.19               | 647.2                 | 1.33               | 266.3                 |
| DSHC700  | 2.55               | 436.8                 | 0.92               | 93.2                  |
| DSHC900  | 2.16               | 230.6                 | 1.01               | 200.2                 |
| DSHC1100 | 1.55               | 335.4                 | 1.34               | 318.8                 |
| DSHC1300 | 4.54               | 316.3                 | 1.38               | 277.2                 |



### Text S1

(1) Calculation formula for  $d_{002}$

$$d_{002} = 0.5\lambda / \sin\theta \quad (1)$$

Where  $\lambda$  is the  $K_{\alpha}$  wavelength of Cu ( $\lambda = 0.15416$  nm),  $\theta$  is the diffraction angle.

### Text S2

(2) Calculation formula for  $L_a$

$$L_a(\text{nm}) = \left( 2.4 \times 10^{-10} \right) \times \lambda^4 \left( \frac{I_D}{I_G} \right)^{-1} \quad (2)$$

Where  $\lambda = 532$  nm is the laser wavelength in nanometers.

### Text S3

(3) Relationship between peak current  $i$  and scan rate  $v$

$$I = a \cdot v^b \quad (3)$$

$$\log i = \log a + b \cdot \log v \quad (4)$$

Where  $a$  and  $b$  are adjustable empirical constants, the value of  $b$  can be obtained from the slope of  $\log(i)$  and  $\log(v)$ . Generally speaking,  $a$  and  $b$  value close to 0.5 indicates that the diffusion process mainly controls the electrochemical reaction, while  $a$  and  $b$  value close to 1 represents an ideal capacitive process.

### Text S4

(4) Contribution equation of pseudo-capacitance behavior to sodium cell

$$i(V) = k_1 v + k_2 v^{0.5} \quad (5)$$

$$i(V)/v^{0.5} = k_1 v^{0.5} + k_2 \quad (6)$$

Where  $i$  is the current,  $v$  is the sweep speed,  $k_1$  and  $k_2$  are constants under a certain voltage,  $k_1 v$  and  $k_2 v^{1/2}$  represent the current contributed by diffusion behavior and pseudocapacitance behavior respectively. At a specific sweep speed, the corresponding values of  $k_1$  and  $k_2$  at a certain voltage can be obtained by fitting the linear relationship in formula (4), so as to calculate the current value contributed by the diffusion behavior and pseudocapacitance behavior.

### Text S5

(5) According to Fick's second law,  $D_{Na^+}$  can be calculated using the following simplified equation.

$$D_{Na^+} = \frac{4}{\pi \tau} \left( \frac{m_B V_m}{M_B S} \right)^2 \left( \frac{\Delta E_s}{\Delta E_\tau} \right)^2 \quad (7)$$

where  $m_B$  represents the weight of the active material on the electrode,  $V_m$  represents the molar volume of carbon,  $M_B$  represents the molecular mass of carbon,  $S$  represents the area of the HCRH-1200 electrode,  $\tau$  represents the pulse time, and  $\Delta E_s$  represents the voltage difference when the voltage reaches a steady state during a single GITT process.
